# Supplementary material for: Cytokine-induced killer cells-assisted tumor-targeting delivery of Her-2 monoclonal antibody-conjugated gold nanostars with NIR photosensitizer for enhanced therapy of cancer
Source: Royal Society of Chemistry journal article supplement (doi:10.1039/d0tb01391a), 2020-01-01
Supplement: d0tb01391a1.pdf [file d0tb01391a1.pdf]

# Cytokine induced killer cells-assisted tumor-targeting delivery of Her-2 monoclonal antibody-conjugated gold nanostars with NIR photosensitizer for enhanced therapy of cancer

Shujing Liang,<sup>✉</sup> Menglin Sun, Yonglin Lu, Shuo Shi, Yiting Yang, Yun Lin, Chan Feng, Jie Liu, Chunyan Dong<sup>✉</sup>

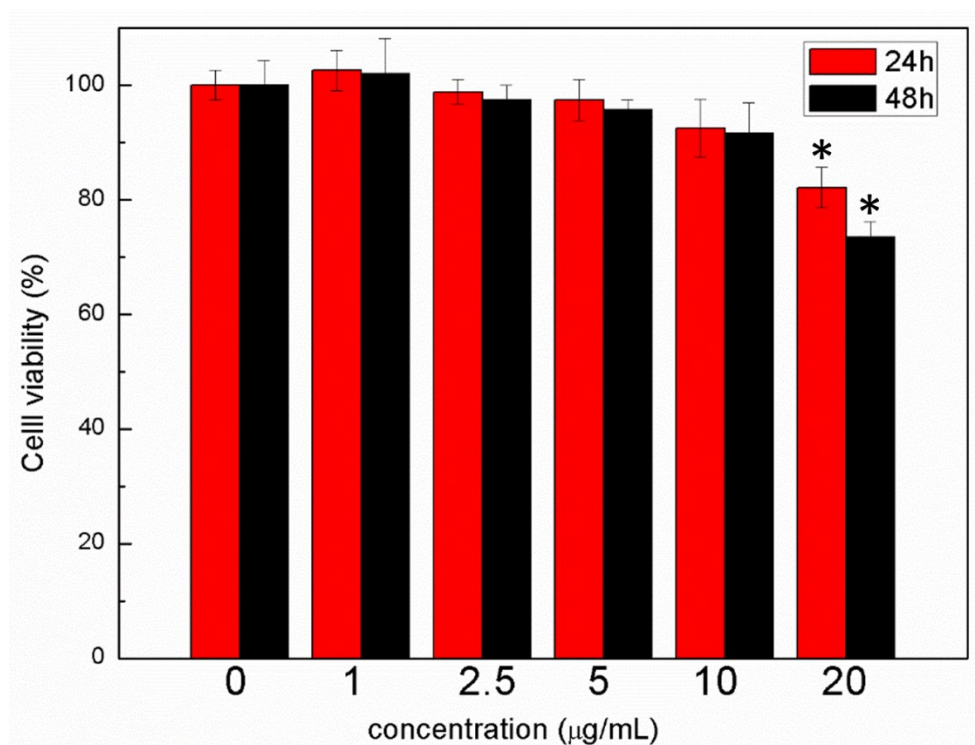

Figure S1. CCK-8 results of CIK cells viability with different ICG concentration containing in GNS@ICG-Ab treated in 24h and 48h (n=5, \*p<0.05).

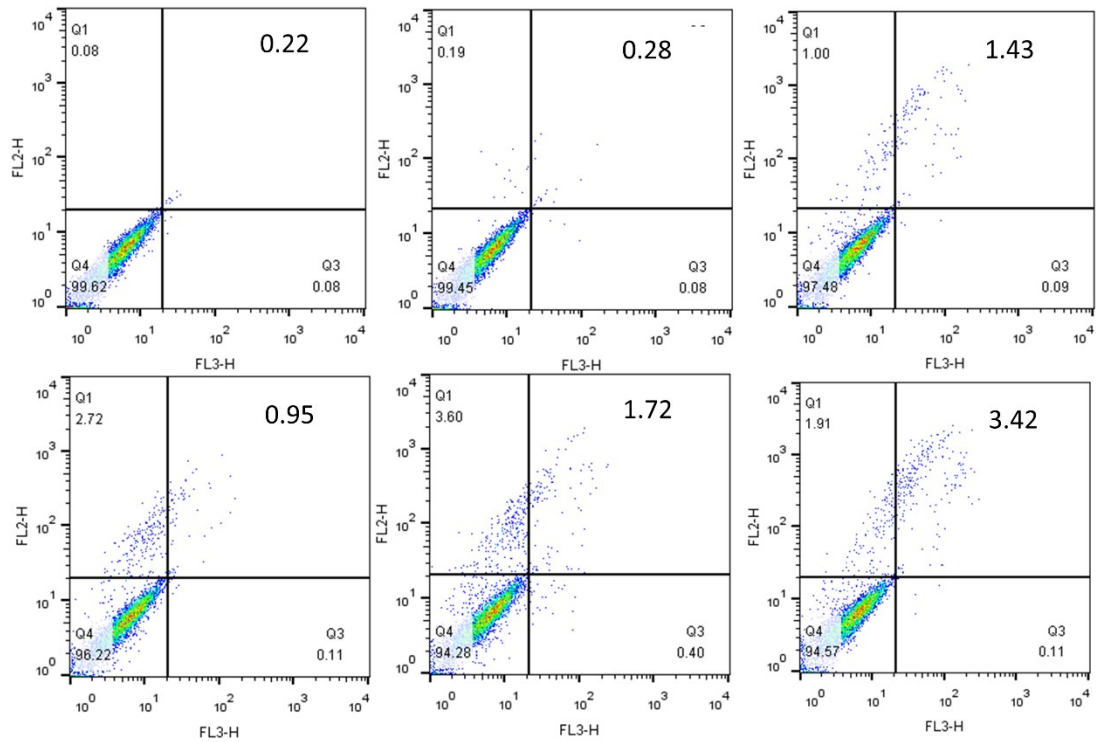

Figure S2. FCM analysis of CIK cells apoptosis induced by GNS@ICG-Ab in different ICG concentration for 48 h.

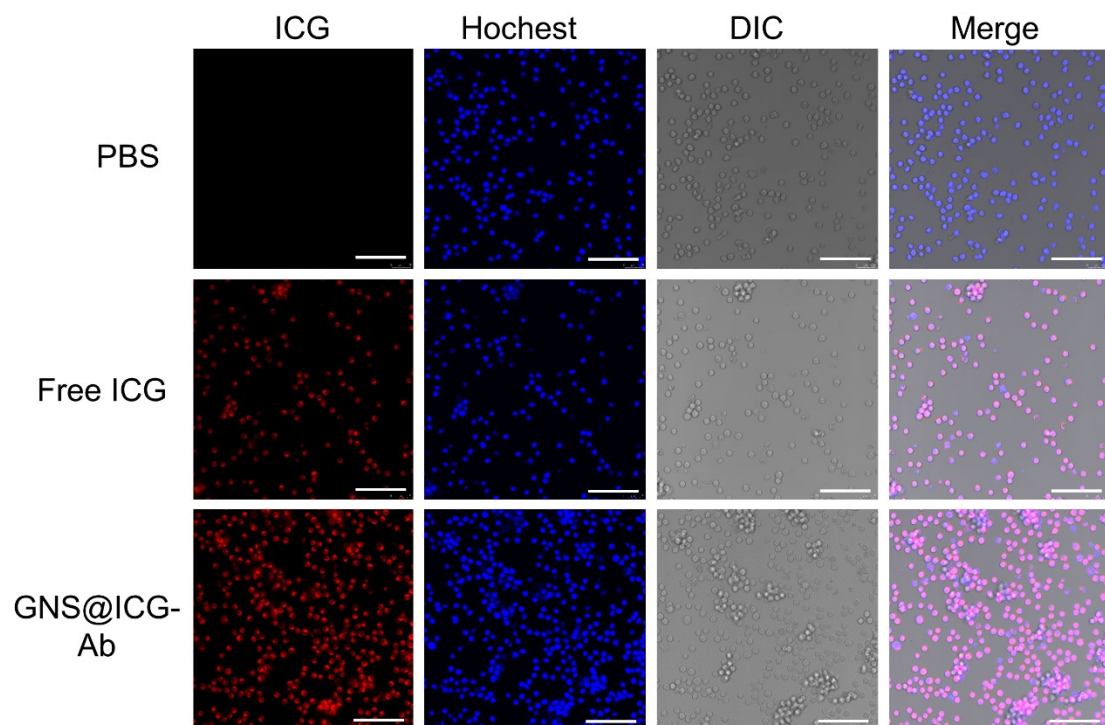

Figure S3. Confocal images of CIK cells exposed to free (PBS) ICG, GNS@ICG-Ab (equivalent concentration: 10  $\mu$ g/mL) for 4 h. Scale bars are 100  $\mu$ m.

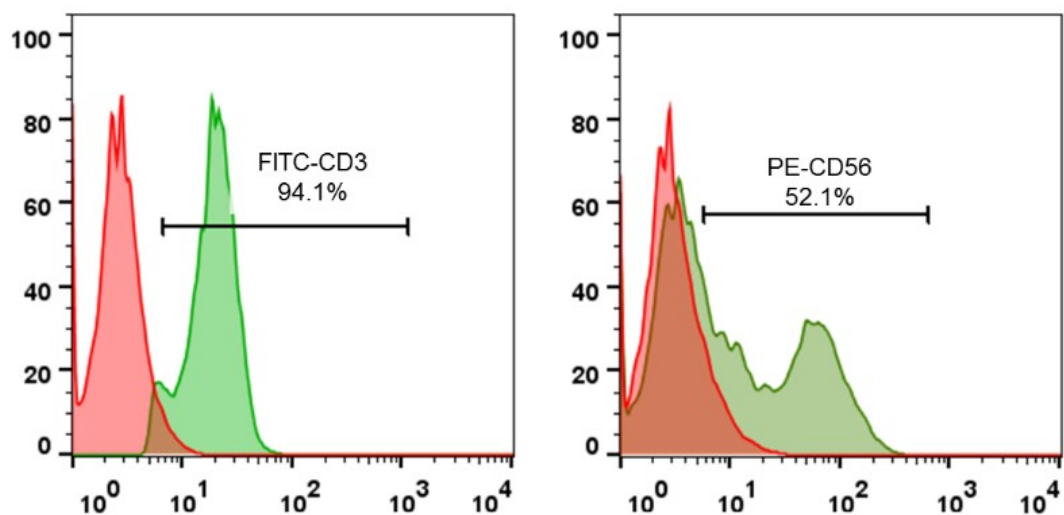

Figure S4. The phenotype analysis of CIK cell after loading nanoprobe.

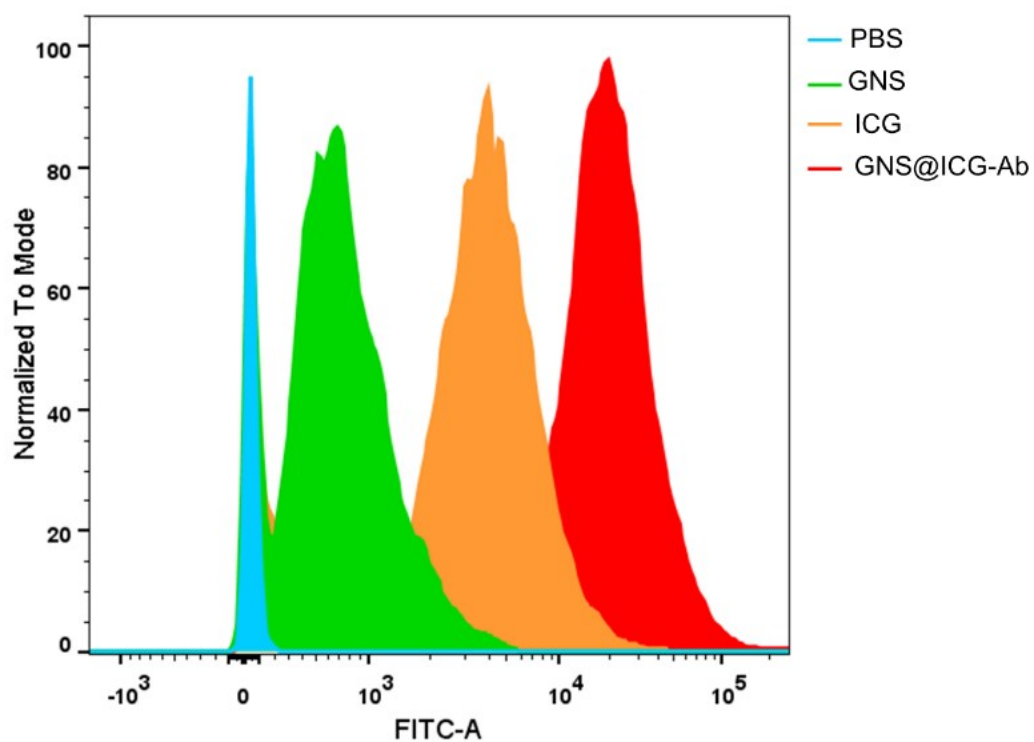

Figure S5. FCM results of ROS generation of SK-BR-3 cells after treated with PBS, GNS, free Ce6 and GNS@ICG@Ab for 24 h respectively with 808 nm laser irradiation.

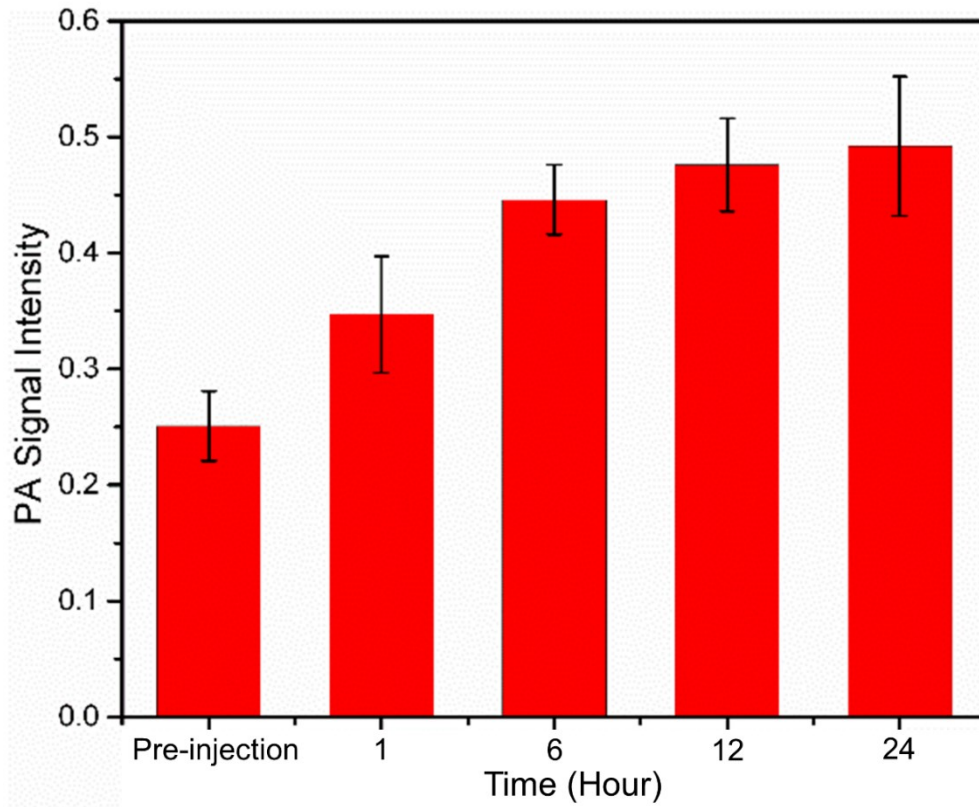

Figure S6. Quantitative analysis of the PA signals from the tumor region.

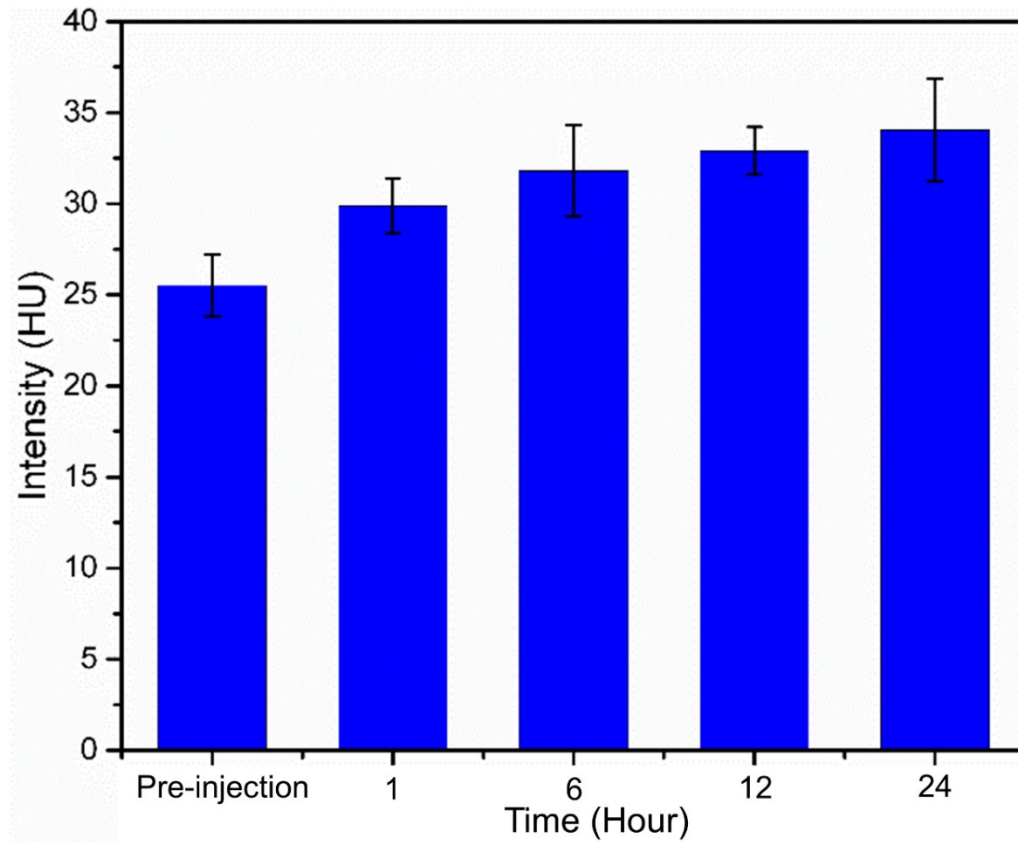

Figure S7. Quantitative analysis of the CT signals from the tumor region.

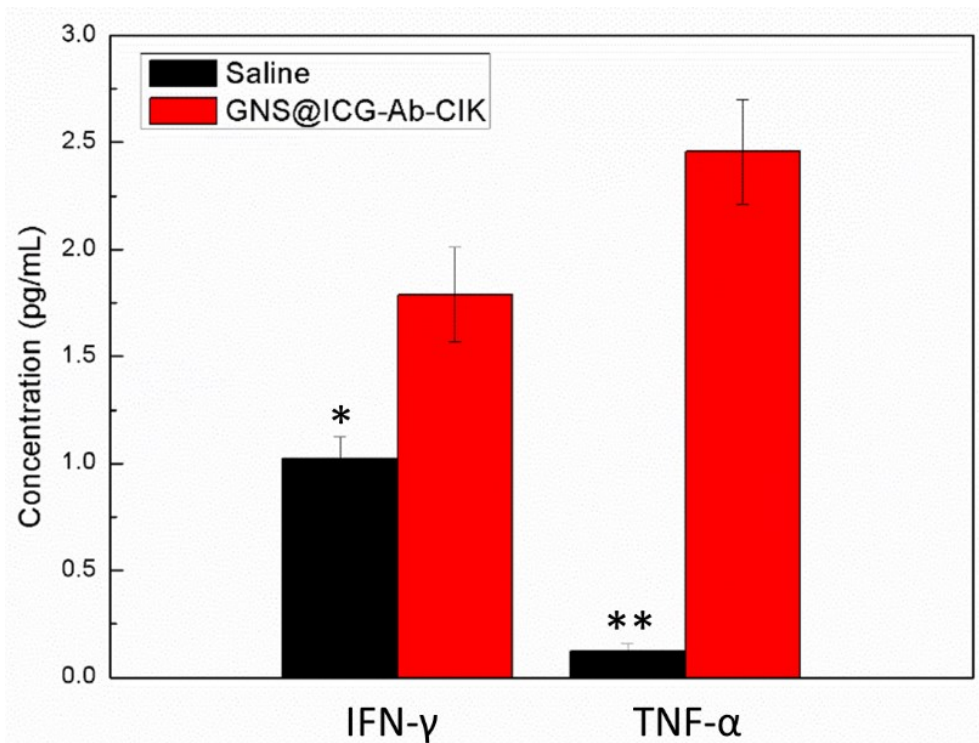

Figure S8. The levels of IFN- $\gamma$  and IFN- $\alpha$  in mice serum treated with saline or GNS@ICG-Ab-CIK after 20 days (n=3, \*p<0.05, \*\*p<0.01), respectively.

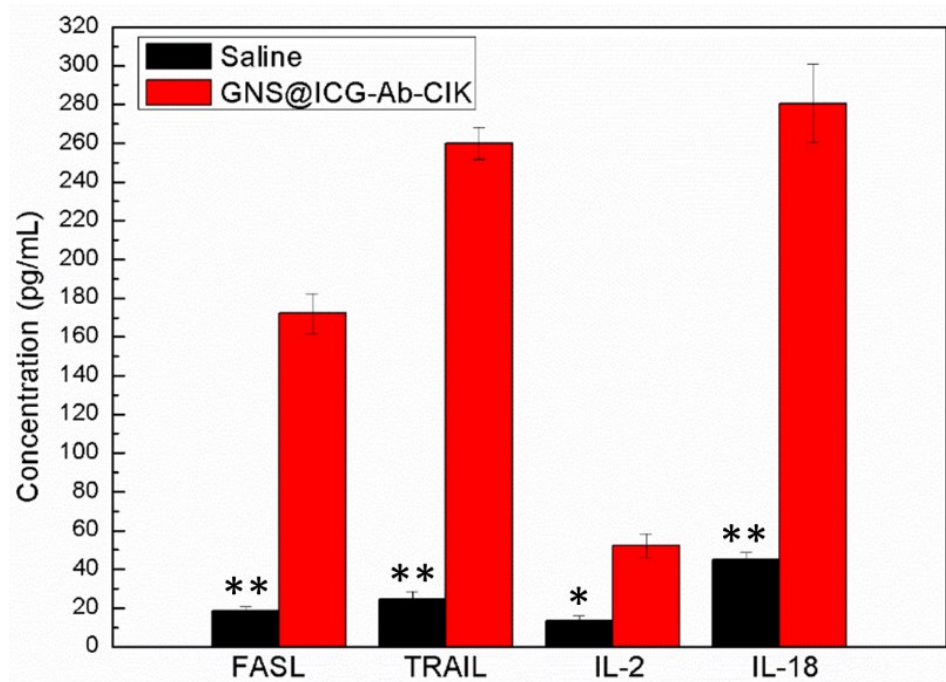

Figure S9. The levels of Cytokine in mice serum treated with saline or GNS@ICG-Ab-CIK after 20 days (n=3, \*p<0.05, \*\*p<0.01), respectively.
